# Supplementary material
Source: PubMed Central journal article supplement (PMC3203701)
Supplement: cr201147x1.pdf [file cr201147x1.pdf]

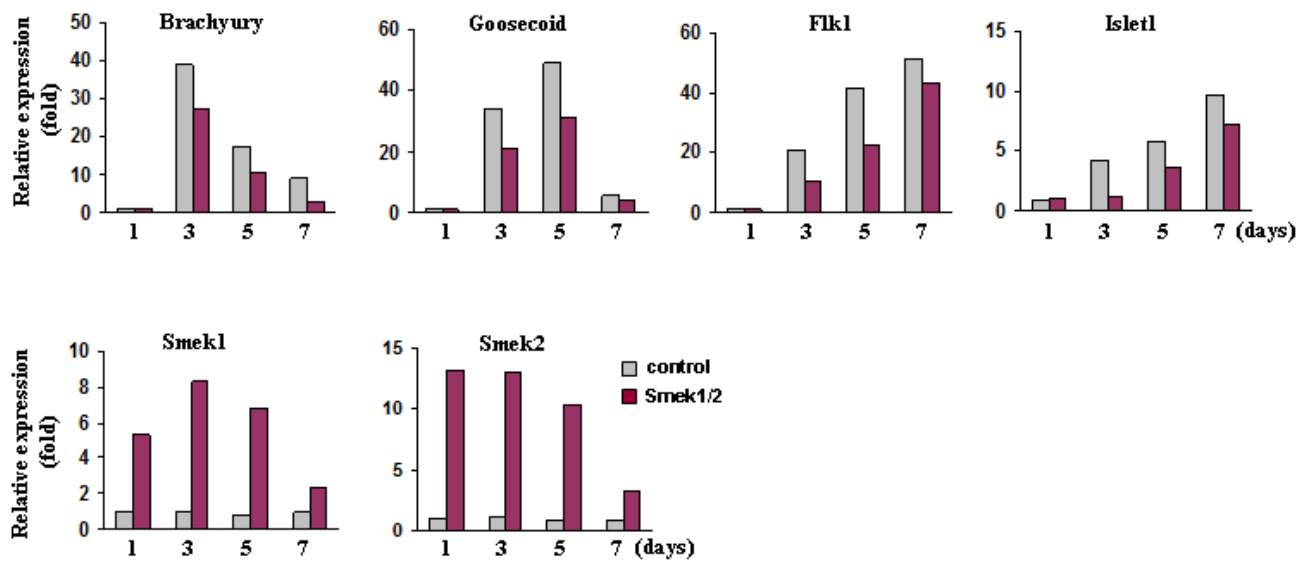

**Supplementary information, Figure S1** Overexpression of Smek reduces differentiation of ESCs into mesoderm.

ESCs transiently transfected with control or both Flag-Smek1 and Flag-Smek2 plasmids were cultured in hanging drops of medium in the absence of LIF. Expression of *brachyury*, *goosecoid*, *flk1*, *islet1*, *smek1*, and *smek2* was analyzed using quantitative real-time PCR. Data were normalized to that of *gapdh*.
