# Supplementary material
Source: PubMed Central journal article supplement (PMC3203701)
Supplement: cr201147x2.pdf [file cr201147x2.pdf]

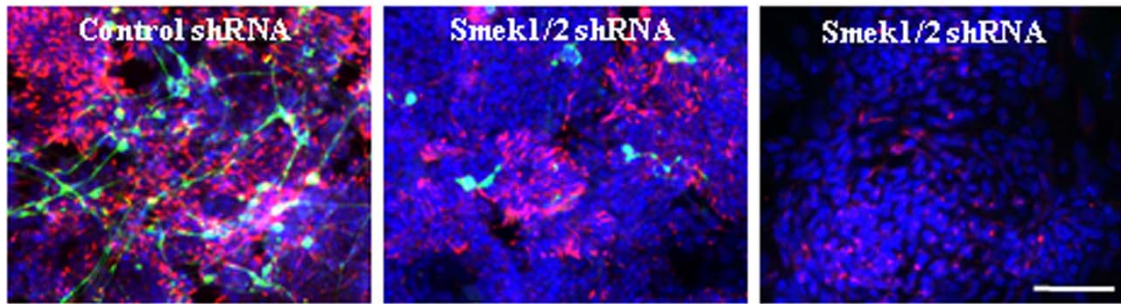

**Supplementary information, Figure S2** Depletion of Smek inhibits neuroectoderm differentiation from ESCs.

ESCs expressing control shRNA and two ESC lines expressing Smek1/2 shRNA were cultured under neural differentiation conditions for 10 days, after which they were immunostained with anti-Nestin (red) and TUJ1 (green) antibodies. Hoechst dye was used for counterstaining. Scale bar, 100  $\mu$ m.
