# Supplementary material
Source: PubMed Central journal article supplement (PMC3203701)
Supplement: cr201147x4.pdf [file cr201147x4.pdf]

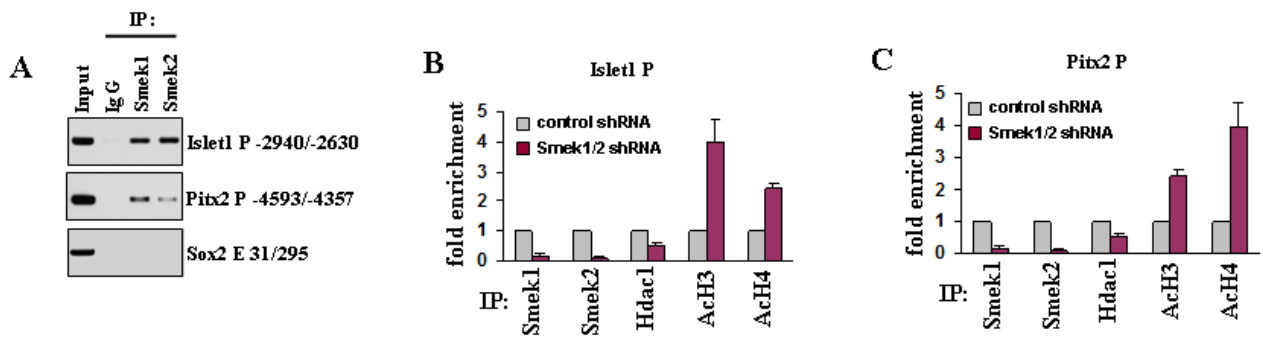

**Supplementary information, Figure S4** Occupancy of Smek at Tcf/Lef binding site region of *islet1* and *pitx2*.

(A) ESCs were subjected to ChIP with Smek1 or Smek2 antibodies, and the immunoprecipitates were PCR-amplified for the promoters of *islet1* and *pitx2* and the enhancer of *sox2*. PCR product contains Tcf/Lef binding sites by using primer sets: for *islet1*, -2940/-2630; for *pitx2*, -4593 /-4351; for *sox2*, 31/295. Numbers refer to nucleotide positions relative to the transcriptional start site +1.. (B, C) ESCs expressing control or double shRNA were subjected to ChIP with the antibodies indicated, and were PCR amplified for *islet1* (C) and *pitx2* (D).
