# Supplementary material
Source: PubMed Central journal article supplement (PMC3203701)
Supplement: cr201147x7.pdf [file cr201147x7.pdf]

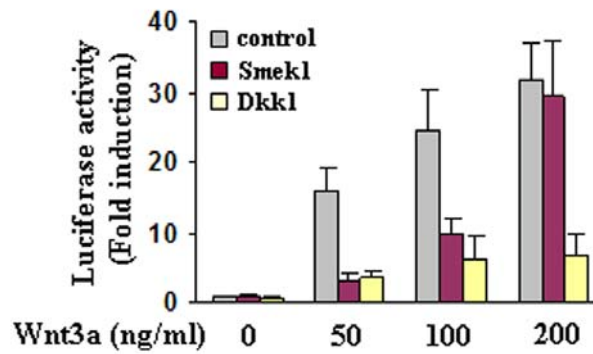

**Supplementary information, Figure S7** Smek-mediated blockade of transcriptional activation by Wnt/ $\beta$ -catenin signaling is dependent on the dose of Wnt3a protein .

HEK293T cells were transfected with TOPFLASH reporter and plasmids expressing Smek1 or Dkk1. After transfection, cells were incubated with or without the indicated concentration of Wnt3a protein for 12 hrs, after which luciferase activity assays were performed. Error bars represents mean  $\pm$  S.D. of three independent experiments.
