# Supplementary material
Source: PubMed Central journal article supplement (PMC3203701)
Supplement: cr201147x8.pdf [file cr201147x8.pdf]

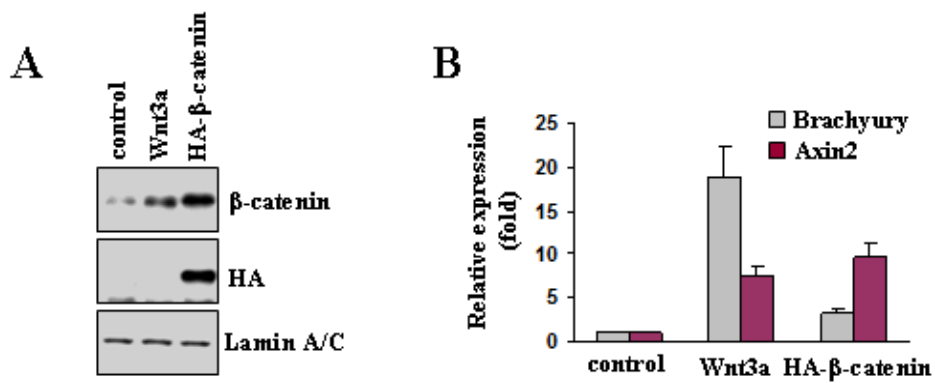

**Supplementary information, Figure S8**  $\beta$ -catenin-independent Wnt signaling increases *brachyury* expression.

ESCs were transiently transfected with HA- $\beta$ -catenin or control plasmids, or treated with Wnt3a protein. Nuclear extracts of cells were subjected to Western blotting with anti- $\beta$ -catenin and -HA antibody (A). Lamin A/C was used as protein markers for nuclear fraction. Western blot analysis shows the increase of nuclear  $\beta$ -catenin by Wnt3a treatment or transfection of plasmid expressing HA- $\beta$ -catenin. Expression of *brachyury* and *axin2* was analyzed using quantitative real-time PCR (B). Data are presented as the mean  $\pm$  S.D. from three independent experiments.
